# Supplementary material for: Identification of a Rye Spring Mutant Derived from a Winter Rye Variety by High-Altitude Environment Screening Using RNA Sequencing Technology
Source: MDPI journal article supplement (doi:10.3390/genes15050572), 2024-04-29
Supplement: s1 [file s1]

## Supplementary Materials

Table S1. Prediction results and data assembly

| Disposal | Total Raw<br>Reads ( M ) | Total Clean<br>Reads ( M ) | Clean Reads<br>Q20 ( % ) | Clean Reads<br>Q30 ( % ) | Clean Reads<br>Ratio ( % ) |
|----------|--------------------------|----------------------------|--------------------------|--------------------------|----------------------------|
| D1       | 43.69                    | 42.52                      | 97.84                    | 92.69                    | 97.31                      |
| D2       | 43.69                    | 42.45                      | 97.96                    | 93.11                    | 97.17                      |
| D3       | 43.69                    | 42.4                       | 97.9                     | 92.91                    | 97.05                      |
| D4       | 43.69                    | 42.46                      | 98.01                    | 93.27                    | 97.18                      |
| D5       | 43.69                    | 42.12                      | 98.03                    | 93.35                    | 96.41                      |
| D6       | 43.69                    | 42.43                      | 98.02                    | 93.28                    | 97.1                       |
| D7       | 43.69                    | 42.25                      | 97.37                    | 91.8                     | 96.71                      |
| D8       | 43.69                    | 42.27                      | 98.08                    | 93.5                     | 96.76                      |
| D9       | 43.69                    | 42.14                      | 97.57                    | 91.9                     | 96.44                      |
| G1       | 43.69                    | 42.18                      | 98.03                    | 93.35                    | 96.55                      |
| G2       | 43.69                    | 42.23                      | 98                       | 93.28                    | 96.65                      |
| G3       | 43.69                    | 42.23                      | 97.88                    | 92.84                    | 96.65                      |
| G4       | 43.69                    | 42.22                      | 97.85                    | 92.72                    | 96.64                      |
| G5       | 43.69                    | 42.32                      | 97.97                    | 93.09                    | 96.86                      |
| G6       | 43.69                    | 42.64                      | 97.95                    | 93.11                    | 97.59                      |
| G7       | 43.69                    | 42.1                       | 98.07                    | 93.49                    | 96.36                      |
| G8       | 43.69                    | 42.3                       | 98.03                    | 93.34                    | 96.83                      |
| G9       | 43.69                    | 42.37                      | 97.94                    | 93.07                    | 96.99                      |

The rye leaf transcriptome was sequenced using the BGI interactive reporting system, resulting in the generation of a comprehensive dataset of full-length transcripts. Initially, a read count of 43.69M was obtained, which was subsequently refined by filtering out reads containing adapters, those with unknown base N content exceeding 5%, and low-quality reads. As a result, the clean read count reached 42.1M or higher. Notably, the sequencing data exhibited exceptional accuracy with Q20 values exceeding 97% and Q30 values surpassing 91%, thereby satisfying the prerequisites for constructing a robust database.

Table S2. Unigene

| Processing | Total<br>Number | Total<br>Length | Mean<br>Length | N50  | N70  | N90 | GC (%) |
|------------|-----------------|-----------------|----------------|------|------|-----|--------|
| D1         | 47187           | 45439129        | 962            | 1679 | 1093 | 407 | 49.04  |
| D2         | 51274           | 48038108        | 936            | 1631 | 1051 | 394 | 49.77  |
| D3         | 47168           | 45472614        | 964            | 1663 | 1090 | 409 | 50.05  |
| D4         | 47459           | 45089974        | 950            | 1645 | 1071 | 398 | 50.13  |
| D5         | 70575           | 55209047        | 782            | 1334 | 813  | 314 | 50.57  |
| D6         | 44815           | 42341601        | 944            | 1637 | 1067 | 398 | 50.26  |
| D7         | 41437           | 39936026        | 963            | 1632 | 1079 | 418 | 50.37  |
| D8         | 41520           | 39308312        | 946            | 1617 | 1060 | 404 | 50.75  |
| D9         | 43748           | 41426074        | 946            | 1627 | 1071 | 403 | 50.32  |
| G1         | 80410           | 59490684        | 739            | 1249 | 751  | 297 | 50.71  |
| G2         | 43227           | 41354632        | 956            | 1646 | 1081 | 405 | 50.52  |
| G3         | 45121           | 44481790        | 985            | 1677 | 1111 | 434 | 50.27  |
| G4         | 58286           | 46170899        | 792            | 1417 | 835  | 306 | 50.87  |
| G5         | 77022           | 56156550        | 729            | 1229 | 731  | 293 | 51.07  |
| G6         | 57282           | 46906254        | 818            | 1460 | 885  | 319 | 50.41  |
| G7         | 75041           | 56249867        | 749            | 1276 | 757  | 301 | 51.07  |
| G8         | 77583           | 57690832        | 743            | 1268 | 747  | 296 | 51.31  |
| G9         | 42706           | 41502197        | 971            | 1665 | 1096 | 422 | 50.54  |

The clean reads ( PCR duplicates removed to enhance assembly efficiency ) were de novo assembled using Trinity, followed by transcript clustering with CD-HIT to eliminate redundancy and obtain Unigene.

Table S3. Functional database annotation

| Values     | Total   | NR      | NT      | Swiss-<br>prot | KEGG    | KOG     | Pfam    | GO      | Interse-<br>ction | Overall |
|------------|---------|---------|---------|----------------|---------|---------|---------|---------|-------------------|---------|
| Number     | 274,923 | 195,773 | 211,282 | 120,950        | 127,966 | 100,138 | 115,445 | 128,492 | 46,612            | 229,790 |
| Percentage | 100%    | 71.21%  | 76.85%  | 43.99%         | 46.55%  | 36.42%  | 41.99%  | 46.74%  | 16.95%            | 83.58%  |

Table S4. RT-PCR primer sequence

| Gene                          | Forward primer ( 5' - 3' )  | Reverse primer ( 5' - 3' )  |
|-------------------------------|-----------------------------|-----------------------------|
| Actin                         | CGTGTGGATTCTGGTGATG         | AGCCACATATGCGAGCTTCT        |
| Gene 1<br>( Sc22136g1_i2G5 )  | ATTACATCGTCTTCCCTTGTTATCATC | TGCTCTTCCAGTACCATAGCTTATAAC |
| Gene 2<br>( Sc18554g1_i1G5 )  | GTCGAGCGGAGGAGATCTGTC       | TCATCAGCATGTCCACTTTCTTCAG   |
| Gene 3<br>( Sc5712g1_i3G8 )   | ATTATTGAACCTGCTAAATGCCGATTG | GCTTTGACAATGCACGCACAAG      |
| Gene 4<br>( Sc10255g1_i2G7 )  | ACCTCGATTCTCTGCCTCTATGC     | TCCACCAGTCTCCTTACCATTCTC    |
| Gene 5<br>( Sc128g3_i1D2 )    | GCCGTACTACTATCCGCCGATG      | CCGTAAACCCTTGCCCTTCCTC      |
| Gene 6<br>( Sc2503g1_i7G8 )   | AACGCTTATCAGGCAATGTCACAAG   | AGTCGCTTCTTCTGCTGAGTAAC     |
| Gene 7<br>( Sc6095g1_i5G6 )   | GCTCACAACAATGTCTCCAGAACC    | TCTTGCCACCTTTCGATCCTTG      |
| Gene 8<br>( Sc7296g5_i1G3 )   | GGTTAGCAGCGGAGGGATATGTC     | TGACTGGTTAGCAGGCATGTGG      |
| Gene 9<br>( Sc1035g1_i1G3 )   | GGAGATCAACGGCGGCTACC        | AGGACGCTGCTGCTTCTTCTG       |
| Gene 10<br>( Sc1067g1_i5D8 )  | GCCTACGTGCGCTACCTTTTC       | TCGTCTCCGCCCTCGATCTC        |
| Gene 11<br>( Sc11059g1_i5G7 ) | AGTTGCTAGACGATCACCTGAAGAC   | GAAGAACAAACGAGCCATCCCAAG    |
| Gene 12<br>( Sc1438g1_i1G9 )  | ACCTCCGCCTCGATCTCAATG       | CAGCCGCTTGCCGAATGC          |
| Gene 13<br>( Sc155g1_i1G5 )   | GCTGATGAGGATGAGTACCGATGC    | TGACTTTGCCGTATTTTCGAGAATGC  |
| Gene 14<br>( Sc15708g1_i1G6 ) | CTCGCCTTATACCTGAGCATATTCG   | GCCAGAAGCCAGTAGAAGTAATCG    |
| Gene 15<br>( Sc10106g1_i4D7 ) | GGGTCTTGGTCGAAAGCTAAC       | GGTATATGGCGATTCGTGGTTGAG    |
| Gene 16<br>( Sc1528g1_i2D7 )  | CGCCTCCAAGCTGCTGTCC         | AGGAGAGGATGAGCGCGAAGG       |
| Gene 17<br>( Sc1630g1_i1G6 )  | CCCAAGATGCTCGCCGTGATG       | TGCCAGCACCGCCACCTC          |
| Gene 18<br>( Sc10133g2_i1G3 ) | TCCAAGTCCAAGCGATCCCAAC      | TCCAAGTCCAAGCGATCCCAAC      |
| Gene 19<br>( Sc19522g1_i3G1 ) | TCCAAGTCCAAGCGATCCCAAC      | CTGTCCGAACGAGGCACCAG        |

|                               |                            |                           |
|-------------------------------|----------------------------|---------------------------|
| Gene 20<br>( Sc8492g1_i5D3 )  | AGCATGTCGGTGTTCTGTCTG      | CGAACGCCCTTCTTGGTTTGTG    |
| Gene 21<br>( Sc9111g1_i2D3 )  | AAGACTCGGGCTCCATATCAAACCTC | TCCTGACGACCCAACTGAATAACC  |
| Gene 22<br>( Sc10133g3_i1G3 ) | AGTATCTTTTCGGGACTGAGGTTGTG | GCTGCTGGAAGAGGAGGAACAC    |
| Gene 23<br>( Sc128g3_i1D2 )   | AAGACTCGGGCTCCATATCAAACCTC | TCCTGACGACCCAACTGAATAACC  |
| Gene 24<br>( Sc519g1_i1D6 )   | GTGCCGTCTATCGCCTACCATC     | GTGCCGTCTATCGCCTACCATC    |
| Gene 25<br>( Sc3962g6_i1D4 )  | TGGTTATTCAGTTGGGTCGTCAGG   | GGCGGCAGGTCTCTTGGATG      |
| Gene 26<br>( Sc705g1_i3D7 )   | TCCTCCGTGACATCTTGAACAGTG   | CGTTGCTCGCCTTGAATGATCTTAG |
| Gene 27<br>( Sc10532g1_i1G5 ) | CCTTCGTCCGTACCACCAATCTC    | TCTCATTTCCGCCGACCTCAAC    |
| Gene 28<br>( Sc188g1_i1G8 )   | ATGGGAAATGGATCGATGGTCTCC   | CAAAGTTTGTGCCTGTTTCTGCTG  |
| Gene 29<br>( Sc188g1_i3G8 )   | GTCAAATGGGAAGTGGATTGATGGG  | CAAAGTTTGTGCCTGTTTCTGCTG  |
| Gene 30<br>( Sc2014g1_i6G7 )  | GCCGTACTACTATCCGCCGATG     | CCGTAAACCCTTGCCCTTCCTC    |
| Gene 31<br>( Sc20227g1_i1G5 ) | GCTCTTGGCTGGGTGGATCG       | CCTCCTGGTGCTGTGCTTGG      |
| Gene 32<br>( Sc2063g1_i1G1 )  | CCGAACGCTTATCAGGCAATGTC    | TCGCTTCTTCCTGCTGAGTAACC   |
| Gene 33<br>( Sc2153g1_i2G1 )  | TAGGGTTTCTTCACACAGGGACAAG  | GA CTCAGCAGCATTCTCATTCTTC |
| Gene 34<br>( Sc2979g1_i2G4 )  | CTTGGCTGTTTAAGAACCTCGGAAC  | GATTTCTGGTCACTTTGTGGGATGC |
| Gene 35<br>( Sc4269g1_i7G5 )  | ACAACCTCCCTCCGGCCAAG       | GCCGTACCGCTCCTTGAACC      |
| Gene 36<br>( Sc4626g1_i1G8 )  | GGAAATGAACCTGAACGGAAGCC    | ATGCCCAAAGGTGCGGTTAGC     |
| Gene 37<br>( Sc7428g1_i4G5 )  | CGTGGATGGCATGAATCAAGGAAG   | TCGTAGCTGCTGGATGGTTGTG    |
| Gene 38<br>( Sc91g1_i7G4 )    | ATGGGAAATGGATCGATGGTCTCC   | CAAAGTTTGTGCCTGTTTCTGCTG  |

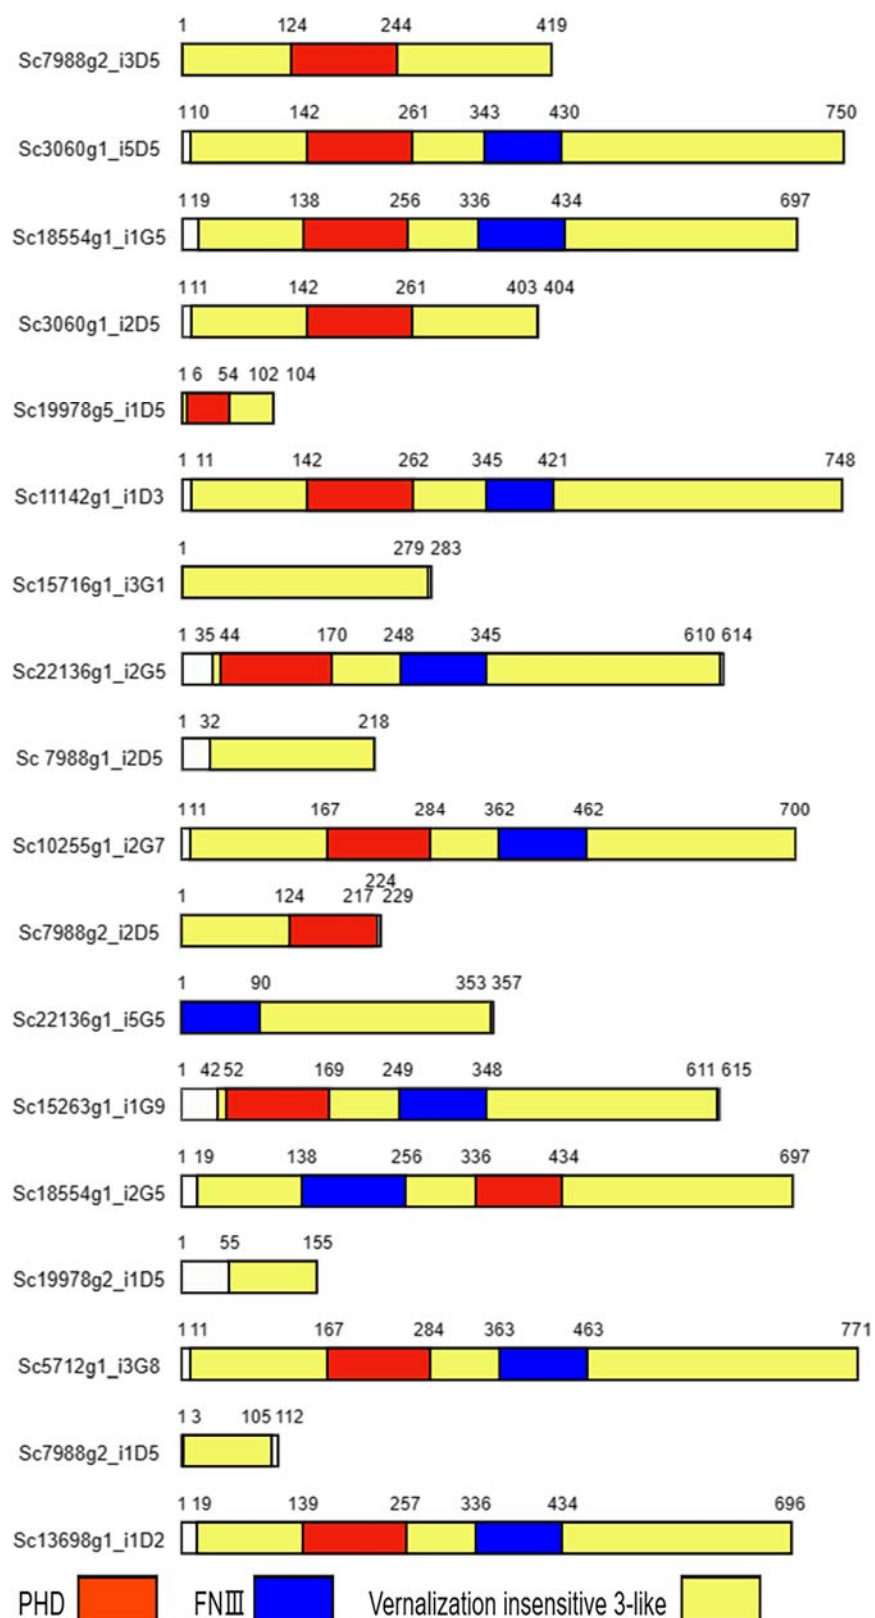

Figure S1. The prediction of protein domains in genes associated with the vernalization process.

Red represents PHD、Blue represents FNIII、Yellow represents Vernalization insensitive 3-like.

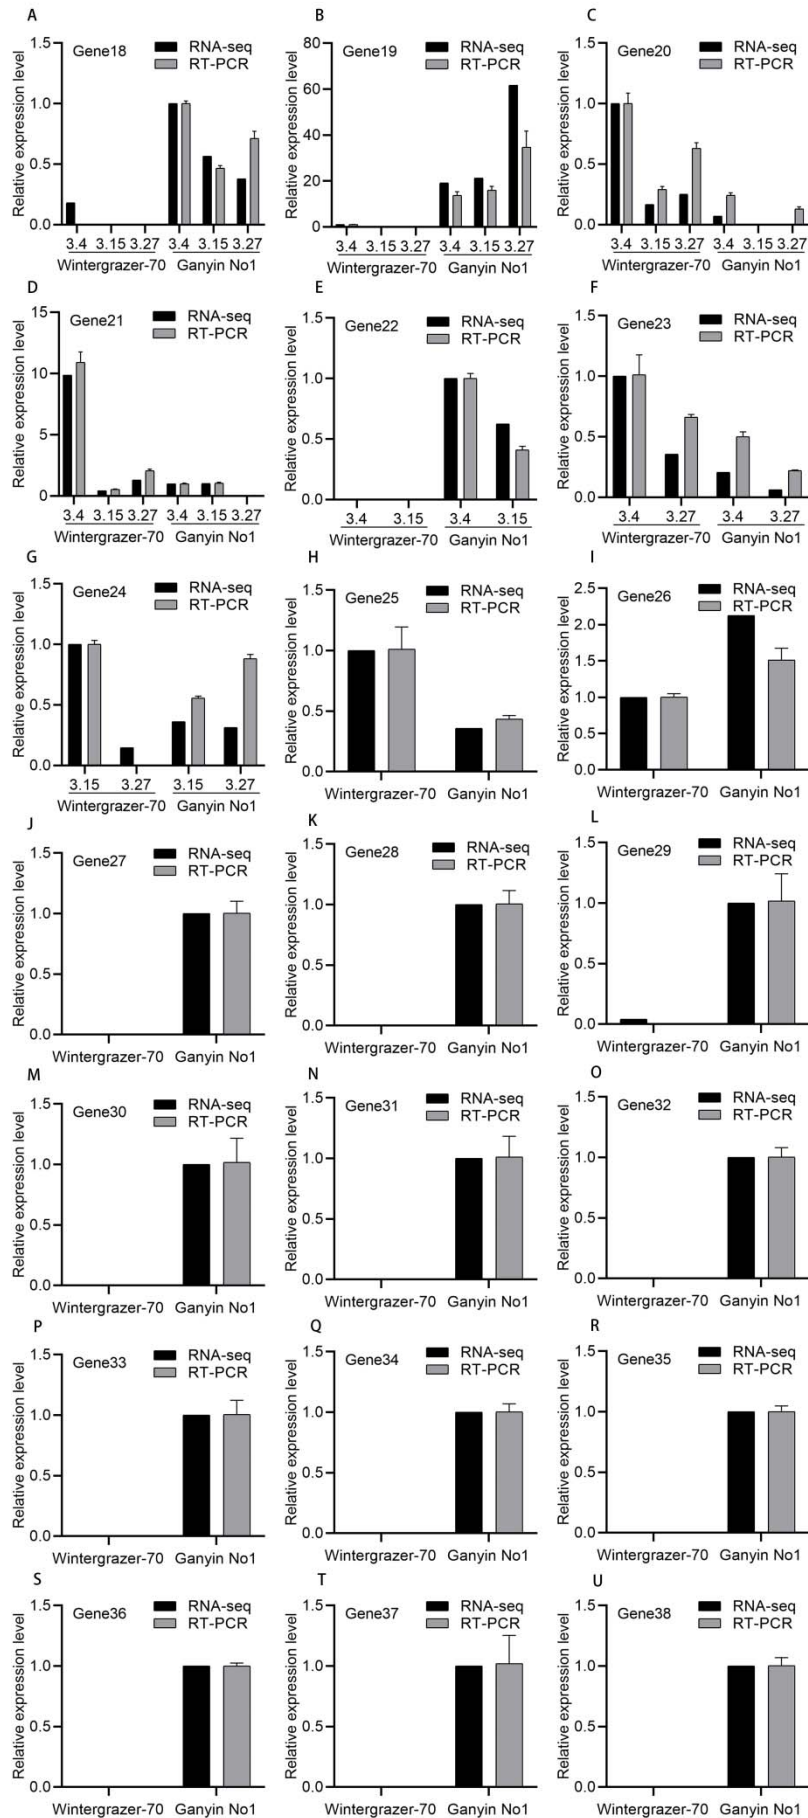

Figure S2. The expression of genes related to photoperiod were assessed using RNA-seq and RT-PCR methodologies

(A)Gene18: Sc10133g2\_i1G3; ( B )Gene19: Sc19522g1\_i3G1; ( C )Gene20: Sc8492g1\_i5D3; ( D )Gene21: Sc9111g1\_i2D3; ( E )Gene22: Sc10133g3\_i1G3; ( F )Gene23: Sc128g3\_i1D2; ( G )Gene24: Sc519g1\_i1D6; ( H )Gene25: Sc3962g6\_i1D4; ( I )Gene26: Sc705g1\_i3D7; ( J )Gene27: Sc10532g1\_i1G5; ( K )Gene28: Sc188g1\_i1G8; ( L )Gene29: Sc188g1\_i3G8; ( M )Gene30: Sc2014g1\_i6G7; ( N )Gene31: Sc20227g1\_i1G5; ( O )Gene32: Sc2063g1\_i1G1; ( P )Gene33: Sc2153g1\_i2G1; ( Q )Gene34: Sc2979g1\_i2G4; ( R )Gene35: Sc4269g1\_i7G5; ( S )Gene36: Sc4626g1\_i1G8; ( T )Gene37: Sc7428g1\_i4G5; ( U )Gene38: Sc91g1\_i7G4 . The primer sequences for gene RT-PCR can be found in the supplementary Table 5.
